# Supplementary material
Source: HighWire-hosted journal article supplement (https://gut.bmj.com/content/69/3/523)
Supplement: inline-supplementary-material-1 [file inline-supplementary-material-1.pdf]

## Appendix

**Table 1a Association of cumulative f-Hb values over the initial 2 rounds and PR - PPV for AN and NNScope – DR of AN and CRC**

**Women aged 50-59**

| sum f-Hb<br>µg/gr<br>FIT1+FIT2 | Examined | FIT + |       | Colonoscopy |       | Advanced<br>adenoma | CRC | PPV AN | DR advanced<br>adenoma | DR CRC | NNScope<br>to detect<br>1 AN |
|--------------------------------|----------|-------|-------|-------------|-------|---------------------|-----|--------|------------------------|--------|------------------------------|
|                                |          | N     | %     | N           | %     |                     |     |        |                        |        |                              |
| <b>0</b>                       | 22,048   | 460   | 2.1%  | 412         | 89.6% | 52                  | 6   | 14.1%  | 0.24%                  | 0.03%  | 7.1                          |
| <b>0.1-3.9</b>                 | 12,708   | 333   | 2.6%  | 292         | 87.7% | 52                  | 12  | 21.9%  | 0.41%                  | 0.09%  | 4.6                          |
| <b>4-9.9</b>                   | 4,632    | 197   | 4.3%  | 187         | 94.9% | 46                  | 11  | 30.5%  | 0.99%                  | 0.24%  | 3.3                          |
| <b>10-14.9</b>                 | 1,097    | 82    | 7.5%  | 78          | 95.1% | 27                  | 3   | 38.5%  | 2.46%                  | 0.27%  | 2.6                          |
| <b>15-19.9</b>                 | 513      | 46    | 9.0%  | 40          | 87.0% | 14                  | 2   | 40.0%  | 2.73%                  | 0.39%  | 2.5                          |
| <b>≥ 20</b>                    | 153      | 32    | 20.9% | 26          | 81.3% | 12                  | 2   | 53.8%  | 7.84%                  | 1.31%  | 1.9                          |
| <b>Total</b>                   | 41,151   | 1,150 | 2.8%  | 1,035       | 90.0% | 203                 | 36  | 23.1%  | 0.49%                  | 0.09%  | 4.3                          |

**Table 1b Association of cumulative f-Hb values over the initial 2 rounds and PR - PPV for AN and NNScope – DR of AN and CRC**

**Women aged 60-69**

| sum f-Hb<br>µg/gr<br>FIT1+FIT2 | Examined | FIT + |       | Colonoscopy |       | Advanced<br>adenoma | CRC | PPV AN | DR advanced<br>adenoma | DR CRC | NNScope<br>to detect<br>1 AN |
|--------------------------------|----------|-------|-------|-------------|-------|---------------------|-----|--------|------------------------|--------|------------------------------|
|                                |          | N     | %     | N           | %     |                     |     |        |                        |        |                              |
| <b>0</b>                       | 22,226   | 587   | 2.6%  | 491         | 83.6% | 47                  | 11  | 11.8%  | 0.21%                  | 0.05%  | 8.5                          |
| <b>0.1-3.9</b>                 | 16,831   | 588   | 3.5%  | 490         | 83.3% | 81                  | 17  | 20.0%  | 0.48%                  | 0.10%  | 5.0                          |
| <b>4-9.9</b>                   | 5,712    | 375   | 6.6%  | 328         | 87.5% | 77                  | 7   | 25.6%  | 1.35%                  | 0.12%  | 3.9                          |
| <b>10-14.9</b>                 | 1,532    | 145   | 9.5%  | 124         | 85.5% | 37                  | 3   | 32.3%  | 2.42%                  | 0.20%  | 3.1                          |
| <b>15-19.9</b>                 | 865      | 98    | 11.3% | 82          | 83.7% | 21                  | 5   | 31.7%  | 2.43%                  | 0.58%  | 3.2                          |
| <b>≥ 20</b>                    | 293      | 78    | 26.6% | 70          | 89.7% | 28                  | 4   | 45.7%  | 9.56%                  | 1.37%  | 2.2                          |
| <b>Total</b>                   | 47,459   | 1,871 | 3.9%  | 1,585       | 84.7% | 291                 | 47  | 21.3%  | 0.61%                  | 0.10%  | 4.7                          |

**Table 1c Association of cumulative f-Hb values over the initial 2 rounds and PR - PPV for AN and NNScope – DR of AN and CRC**  
**Men aged 50-59**

| sum f-Hb<br>µg/gr<br>FIT1+FIT2 | Examined | FIT + |       | Colonoscopy |       | Advanced<br>adenoma | CRC | PPV AN | DR advanced<br>adenoma | DR CRC | NNScope<br>to detect<br>1 AN |
|--------------------------------|----------|-------|-------|-------------|-------|---------------------|-----|--------|------------------------|--------|------------------------------|
|                                |          | N     | %     | N           | %     |                     |     |        |                        |        |                              |
| <b>0</b>                       | 18,040   | 427   | 2.4%  | 376         | 88.1% | 55                  | 7   | 16.5%  | 0.30%                  | 0.04%  | 6.1                          |
| <b>0.1-3.9</b>                 | 10,478   | 344   | 3.3%  | 308         | 89.5% | 57                  | 4   | 19.8%  | 0.54%                  | 0.04%  | 5.1                          |
| <b>4-9.9</b>                   | 3,905    | 220   | 5.6%  | 194         | 88.2% | 63                  | 3   | 34.0%  | 1.61%                  | 0.08%  | 2.9                          |
| <b>10-14.9</b>                 | 1,088    | 98    | 9.0%  | 91          | 92.9% | 40                  | 4   | 48.4%  | 3.68%                  | 0.37%  | 2.1                          |
| <b>15-19.9</b>                 | 572      | 73    | 12.8% | 63          | 86.3% | 33                  | 2   | 55.6%  | 5.77%                  | 0.35%  | 1.8                          |
| <b>≥ 20</b>                    | 254      | 62    | 24.4% | 55          | 88.7% | 25                  | 4   | 52.7%  | 9.84%                  | 1.57%  | 1.9                          |
| <b>Total</b>                   | 34,337   | 1,224 | 3.6%  | 1,087       | 88.8% | 273                 | 24  | 27.3%  | 0.80%                  | 0.07%  | 3.7                          |

**Table 1d Association of cumulative f-Hb values over the initial 2 rounds and PR - PPV for AN and NNScope – DR of AN and CRC**  
**Men aged 60-69**

| sum f-Hb<br>µg/gr<br>FIT1+FIT2 | Examined | FIT + |       | Colonoscopy |       | Advanced<br>adenoma | CRC | PPV AN | DR advanced<br>adenoma | DR CRC | NNScope<br>to detect<br>1 AN |
|--------------------------------|----------|-------|-------|-------------|-------|---------------------|-----|--------|------------------------|--------|------------------------------|
|                                |          | N     | %     | N           | %     |                     |     |        |                        |        |                              |
| <b>0</b>                       | 18,265   | 600   | 3.3%  | 514         | 85.7% | 103                 | 11  | 22.2%  | 0.56%                  | 0.06%  | 4.5                          |
| <b>0.1-3.9</b>                 | 14,335   | 630   | 4.4%  | 531         | 84.3% | 104                 | 23  | 23.9%  | 0.73%                  | 0.16%  | 4.2                          |
| <b>4-9.9</b>                   | 5,466    | 455   | 8.3%  | 389         | 85.5% | 115                 | 15  | 33.4%  | 2.10%                  | 0.27%  | 3.0                          |
| <b>10-14.9</b>                 | 1,619    | 191   | 11.8% | 171         | 89.5% | 57                  | 15  | 42.1%  | 3.52%                  | 0.93%  | 2.4                          |
| <b>15-19.9</b>                 | 962      | 150   | 15.6% | 130         | 86.7% | 55                  | 7   | 47.7%  | 5.72%                  | 0.73%  | 2.1                          |
| <b>≥ 20</b>                    | 429      | 120   | 28.0% | 110         | 91.7% | 46                  | 11  | 51.8%  | 10.72%                 | 2.56%  | 1.9                          |
| <b>Total</b>                   | 41,076   | 2,146 | 5.2%  | 1,845       | 86.0% | 480                 | 82  | 30.5%  | 1.17%                  | 0.20%  | 3.3                          |

Table 2 **Association of cumulative f-Hb values over the initial 3 rounds and PR - PPV for AN and NNScope – DR of AN and CRC**  
**Men + women - age 50-69**

| sum f-Hb<br>µg/gr<br>FIT1+FIT2+FIT3 | Examined | FIT + |       | Colonoscopy |       | Advanced<br>adenoma | CRC | PPV AN | DR advanced<br>adenoma | DR CRC | NNScope<br>to detect<br>1 AN |
|-------------------------------------|----------|-------|-------|-------------|-------|---------------------|-----|--------|------------------------|--------|------------------------------|
|                                     |          | N     | %     | N           | %     |                     |     |        |                        |        |                              |
| <b>0</b>                            | 31562    | 712   | 2.3%  | 652         | 91.6% | 108                 | 12  | 18.4%  | 0.3%                   | 0.04%  | 5.43                         |
| <b>0.1-3.9</b>                      | 28996    | 862   | 3.0%  | 732         | 84.9% | 114                 | 20  | 18.3%  | 0.4%                   | 0.07%  | 5.46                         |
| <b>4-9.9</b>                        | 13164    | 687   | 5.2%  | 604         | 87.9% | 168                 | 15  | 30.3%  | 1.3%                   | 0.11%  | 3.30                         |
| <b>10-14.9</b>                      | 3683     | 299   | 8.1%  | 271         | 90.6% | 77                  | 15  | 33.9%  | 2.1%                   | 0.41%  | 2.95                         |
| <b>15-19.9</b>                      | 2011     | 210   | 10.4% | 186         | 88.6% | 68                  | 6   | 39.8%  | 3.4%                   | 0.30%  | 2.51                         |
| <b>≥ 20</b>                         | 1197     | 218   | 18.2% | 195         | 89.4% | 91                  | 12  | 52.8%  | 7.6%                   | 1.00%  | 1.89                         |
| <b>Total</b>                        | 80613    | 2988  | 3.7%  | 2640        | 88.4% | 626                 | 80  | 26.7%  | 0.8%                   | 0.10%  | 3.74                         |

**Table 3.** Predictors of the DR of advanced neoplasia at the fourth FIT

|                                                                                            |                | Advanced neoplasia* |            | Advanced neoplasia ** |             |
|--------------------------------------------------------------------------------------------|----------------|---------------------|------------|-----------------------|-------------|
|                                                                                            |                | OR                  | 95%CI      | OR                    | 95%CI       |
| <b>GENDER</b>                                                                              | <b>Women</b>   | <b>1</b>            |            | <b>1</b>              |             |
|                                                                                            | <b>Men</b>     | <b>1.94</b>         | 1.66-2.26  | <b>1.86</b>           | 1.59-2.17   |
| <b>AGE (years)</b>                                                                         | <b>50-59</b>   | <b>0.87</b>         | 0.73-1.03  | <b>0.90</b>           | 0.76-1.07   |
|                                                                                            | <b>60-69</b>   | <b>1</b>            |            | <b>1</b>              |             |
| <b>INTERVAL SINCE LAST FIT (months)</b>                                                    | <b>18-22</b>   | <b>0.95</b>         | 0.67-1.35  | <b>0.92</b>           | 0.65-1.32   |
|                                                                                            | <b>23-27</b>   | <b>1</b>            |            | <b>1</b>              |             |
|                                                                                            | <b>28-32</b>   | <b>1.33</b>         | 1.06-1.66  | <b>1.33</b>           | 1.06-1.67   |
|                                                                                            | <b>33-36</b>   | <b>1.64</b>         | 0.98-2.74  | <b>1.72</b>           | 1.02-2.88   |
|                                                                                            | <b>37-60</b>   | <b>1.24</b>         | 0.63-2.41  | <b>1.17</b>           | 0.60-2.30   |
| <b>Cumulative f-Hb level at previous 2 FIT tests * (FIT1+FIT2) µg Hb /gr faeces</b>        | <b>0</b>       | <b>1</b>            |            |                       |             |
|                                                                                            | <b>0.1-3.9</b> | <b>1.33</b>         | 1.09-1.62  |                       |             |
|                                                                                            | <b>4-9.9</b>   | <b>2.34</b>         | 1.89-2.89  |                       |             |
|                                                                                            | <b>10-14.9</b> | <b>4.21</b>         | 3.18-5.57  |                       |             |
|                                                                                            | <b>15-19.9</b> | <b>7.64</b>         | 5.69-10.26 |                       |             |
|                                                                                            | <b>≥ 20</b>    | <b>12.68</b>        | 8.56-18.56 |                       |             |
| <b>Cumulative f-Hb level at previous 3 FIT tests ** (FIT1+FIT2+ FIT3) µg Hb /gr faeces</b> | <b>0</b>       |                     |            | <b>1</b>              |             |
|                                                                                            | <b>0.1-3.9</b> |                     |            | <b>1.32</b>           | 1.03-1.67   |
|                                                                                            | <b>4-9.9</b>   |                     |            | <b>3.71</b>           | 2.94-4.67   |
|                                                                                            | <b>10-14.9</b> |                     |            | <b>6.62</b>           | 5.03-8.71   |
|                                                                                            | <b>15-19.9</b> |                     |            | <b>9.81</b>           | 7.31-13.17  |
|                                                                                            | <b>≥ 20</b>    |                     |            | <b>23.26</b>          | 17.71-30.53 |

**Table 4.** Cumulative DR of advanced neoplasia (advanced adenoma or CRC)  
by cumulative f-Hb concentration over 2 consecutive FITs and time since the second FIT

|                                       | Men 50-59          |                            | Women 50-59        |                            | All screenees - 50-59 |                            |
|---------------------------------------|--------------------|----------------------------|--------------------|----------------------------|-----------------------|----------------------------|
| $\mu\text{g Hb /gr faeces}$<br>Months | 0<br>%<br>(95% CI) | $\geq 20$<br>%<br>(95% CI) | 0<br>%<br>(95% CI) | $\geq 20$<br>%<br>(95% CI) | 0<br>%<br>(95% CI)    | $\geq 20$<br>%<br>(95% CI) |
| 24                                    | 0.07<br>0.04-0.12  | 1.05<br>0.40-1.78          | 0.04<br>0.02-0.08  | 1.26<br>0.41-3.86          | 0.05<br>0.04-0.08     | 1.13<br>0.54-2.36          |
| 36                                    | 0.58<br>0.48-0.71  | 15.24<br>11.82-19.54       | 0.35<br>0.28-0.44  | 14.51<br>10.35-20.14       | 0.45<br>0.39-0.53     | 14.93<br>12.20-18.22       |
| 48                                    | 0.69<br>0.57-0.83  | 17.87<br>14.10-22.50       | 0.40<br>0.32-0.50  | 14.51<br>10.35-20.14       | 0.53<br>0.46-0.61     | 16.59<br>13.67-20.06       |
| 54                                    | 1.91<br>1.62-2.26  | 32.75<br>25.44-41.52       | 1.12<br>0.92-1.37  | 16.69<br>11.86-23.20       | 1.48<br>1.30-1.68     | 26.85<br>21.78-32.83       |

|                                       | Men 60-69          |                            | Women 60-69         |                            | All screenees - 60-69 |                            |
|---------------------------------------|--------------------|----------------------------|---------------------|----------------------------|-----------------------|----------------------------|
| $\mu\text{g Hb /gr faeces}$<br>Months | 0<br>%<br>(95% CI) | $\geq 20$<br>%<br>(95% CI) | 0<br>%<br>(95% CI)  | $\geq 20$<br>%<br>(95% CI) | 0<br>%<br>(95% CI)    | $\geq 20$<br>%<br>(95% CI) |
| 24                                    | 0.12<br>0.08-0.19  | 1.86<br>0.78-4.42          | 0.02<br>(0.01-0.06) | 1.04<br>0.26-4.10          | 0.07<br>0.05-0.10     | 1.53<br>0.73-3.18          |
| 36                                    | 0.60<br>0.47-0.66  | 14.71<br>10.21-20.94       | 0.25<br>0.18-0.35   | 11.32<br>6.72-18.73        | 0.41<br>0.34-0.50     | 13.31<br>9.88-17.31        |
| 48                                    | 0.75<br>0.60-0.94  | 17.00<br>11.85-24.08       | 0.37<br>0.27-0.50   | 12.82<br>7.71-20.92        | 0.54<br>0.45-0.65     | 15.28<br>11.40-20.34       |
| 54                                    | 1.93<br>1.47-2.54  | 24.04<br>16.51-34.21       | 0.77<br>0.59-1.02   | 20.16<br>12.18-32.31       | 1.29<br>1.05-1.58     | 26.53<br>16.06-30.07       |

**Table 5 Association of cumulative f-Hb values over the initial 2 rounds and PR - PPV for AN and NNScope – DR of AN and CRC**  
**Men + women - age 50-69**  
 (subjects examined in Reggio Emilia after Mach 2010 are excluded)

| sum f-Hb<br>µg/gr<br>FIT1+FIT2 | Examined | FIT + |       | Colonoscopy |       | Advanced<br>adenoma | CRC | PPV AN | DR advanced<br>adenoma | DR CRC | NNScope<br>to detect<br>1 AN |
|--------------------------------|----------|-------|-------|-------------|-------|---------------------|-----|--------|------------------------|--------|------------------------------|
|                                |          | N     | %     | N           | %     |                     |     |        |                        |        |                              |
| <b>0</b>                       | 69,517   | 1,767 | 2.5%  | 1,517       | 85.9% | 216                 | 30  | 16.2%  | 0.3%                   | 0.04%  | 6.2                          |
| <b>0.1-3.9</b>                 | 51,931   | 1,789 | 3.4%  | 1,523       | 85.1% | 272                 | 51  | 21.2%  | 0.5%                   | 0.10%  | 4.7                          |
| <b>4-9.9</b>                   | 18,386   | 1,163 | 6.3%  | 1,021       | 87.8% | 277                 | 33  | 30.4%  | 1.5%                   | 0.18%  | 3.3                          |
| <b>10-14.9</b>                 | 4,909    | 472   | 9.6%  | 422         | 89.4% | 145                 | 23  | 39.8%  | 3.0%                   | 0.47%  | 2.5                          |
| <b>15-19.9</b>                 | 2,673    | 333   | 12.5% | 285         | 85.6% | 108                 | 15  | 43.2%  | 4.0%                   | 0.56%  | 2.3                          |
| <b>≥ 20</b>                    | 1,036    | 262   | 25.3% | 233         | 88.9% | 99                  | 20  | 51.1%  | 9.6%                   | 1.93%  | 2.0                          |
| <b>Total</b>                   | 148,452  | 5,786 | 3.9%  | 5,001       | 86.4% | 1117                | 172 | 25.8%  | 0.8%                   | 0.12%  | 3.9                          |
